# Supplementary material for: Efficient conversion of glucosamine to levulinic acid in a sulfamic acid-catalyzed hydrothermal reaction
Source: Royal Society of Chemistry journal article supplement (doi:10.1039/c7ra12980g), 2018-01-01
Supplement: c7ra12980g1.pdf [file c7ra12980g1.pdf]

**Supplementary materials**

**Efficient conversion of glucosamine to levulinic acid over sulfamic acid-  
catalyzed hydrothermal reaction**

Hyo Seon Kim<sup>1</sup>, Sung-Koo Kim<sup>1</sup>, Gwi-Taek Jeong<sup>1\*</sup>

<sup>1</sup>Department of Biotechnology, Pukyong National University, Busan 48513, Republic of  
Korea

\*Corresponding author: Gwi-Taek Jeong

Department of Biotechnology,

Pukyong National University, Busan 48513, Republic of Korea

Tel: +82-51-629-5869

Fax: +82-51-629-5863

E-mail:

gtjeong@pknu.ac.kr

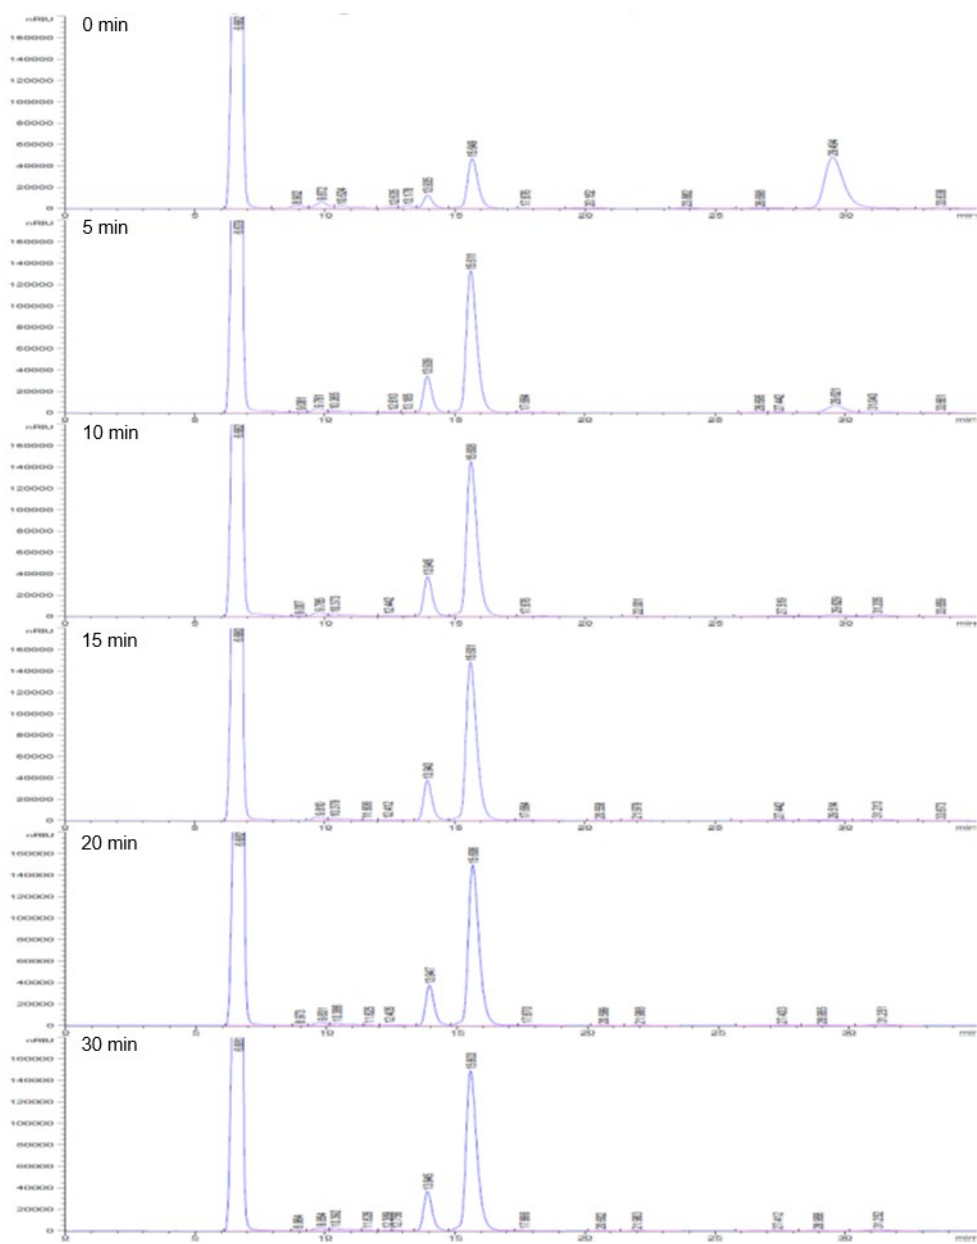

Fig. 1S. HPLC chromatogram of sulfamic acid-catalyzed hydrothermal conversion of glucosamine.

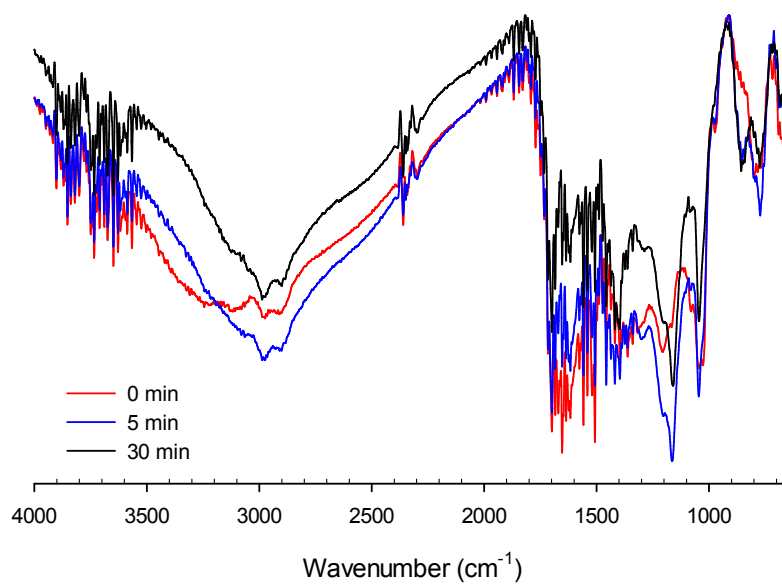

Fig. 2S. FT-IR spectra of residues during conversion reaction of glucosamine with sulfamic acid. The data of 30 min is the same as Fig. 6.
